# Supplementary material for: Synergistic blocking of RAS downstream signaling and epigenetic pathway in KRAS mutant pancreatic cancer
Source: publisher site journal article supplement (doi:10.18632/aging.204031), 2022-04-25
Supplement: Supplementary file [file aging-v14i8-204031-supplementary-material-SD1.pdf]

## SUPPLEMENTARY TABLES

**Supplementary Table 1. Parameters of proliferation curve fitting with trametinib in PDAC.**

| Cell lines | Bottom | Top   | LogIC50 | HillSlope | IC50(nM) |
|------------|--------|-------|---------|-----------|----------|
| AsPC-1     | 26.22  | 122   | 0.01952 | -0.3883   | 1.046    |
| MIA PaCa-2 | 32.94  | 96.05 | 0.9622  | -0.5241   | 9.167    |
| PANC-1     | 42.92  | 104.9 | 3.013   | -0.2029   | 1031     |
| HuP-T4     | 54.26  | 194.6 | -3.236  | -0.2279   | -        |
| HuP-T3     | 61.18  | 102.2 | 3.335   | -0.6284   | -        |
| PSN1       | 3.702  | 106   | 0.5873  | -0.4583   | 3.866    |
| CFPAC-1    | 45.41  | 107.8 | 1.787   | -0.6881   | 61.22    |

Abbreviations: PDAC, pancreatic ductal adenocarcinoma.

**Supplementary Table 2. Parameters of proliferation curve fitting with JQ1 in PDAC.**

| Cell lines | Bottom | Top   | LogIC50 | HillSlope | IC50(nM) |
|------------|--------|-------|---------|-----------|----------|
| AsPC-1     | 53.65  | 99.85 | 2.423   | -0.7698   | -        |
| MIA PaCa-2 | 44.3   | 102.9 | 2.378   | -1.33     | 238.7    |
| PANC-1     | 53.97  | 102.4 | 2.506   | -1.448    | -        |
| HuP-T4     | 44.01  | 101.9 | 2.25    | -1.738    | 177.6    |
| HuP-T3     | 52.07  | 104.6 | 2.244   | -1.375    | -        |
| PSN1       | 58.84  | 104.7 | 2.681   | -1.478    | -        |
| CFPAC-1    | 37.7   | 95.25 | 2.559   | -0.8447   | 362.3    |

Abbreviations: PDAC, pancreatic ductal adenocarcinoma.
